# Supplementary material for: A Parameter Refinement Method for Ptychography Based on Deep Learning Concepts
Source: MDPI journal article supplement (doi:10.3390/condmat6040036), 2021-10-14
Supplement: s1 [file s1]

Archive with 1 entries (1 files):
- condensedmatter-1378331-supplementary.pdf
